# Supplementary material for: Polyclonal regeneration of mouse bone marrow endothelial cells after irradiative conditioning
Source: PubMed Central journal article supplement (PMC11602546; doi:10.1016/j.celrep.2024.114779), 2024-10-26
Supplement: mmc1.pdf [file mmc1.pdf]

**Cell Reports, Volume 43**

**Supplemental information**

**Polyclonal regeneration of mouse bone marrow  
endothelial cells after irradiative conditioning**

**Izabella Skulimowska, Jan Morys, Justyna Sosniak, Monika Gonka, Gunsagar Gulati, Rahul Sinha, Kacper Kowalski, Sylwester Mosiolek, Irving L. Weissman, Alicja Jozkowicz, Agata Szade, and Krzysztof Szade**

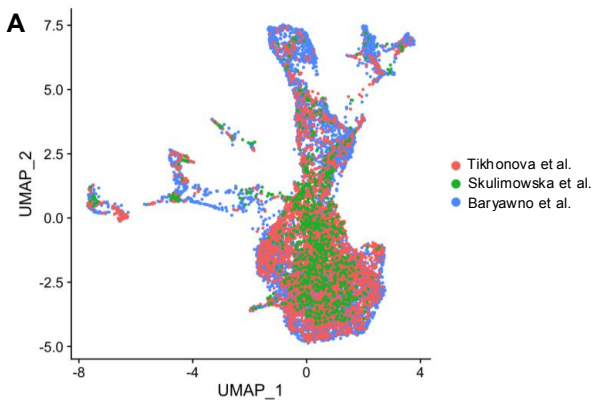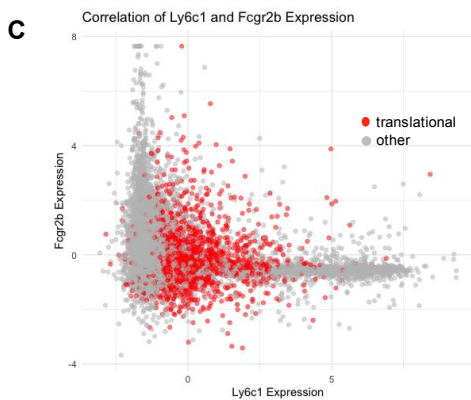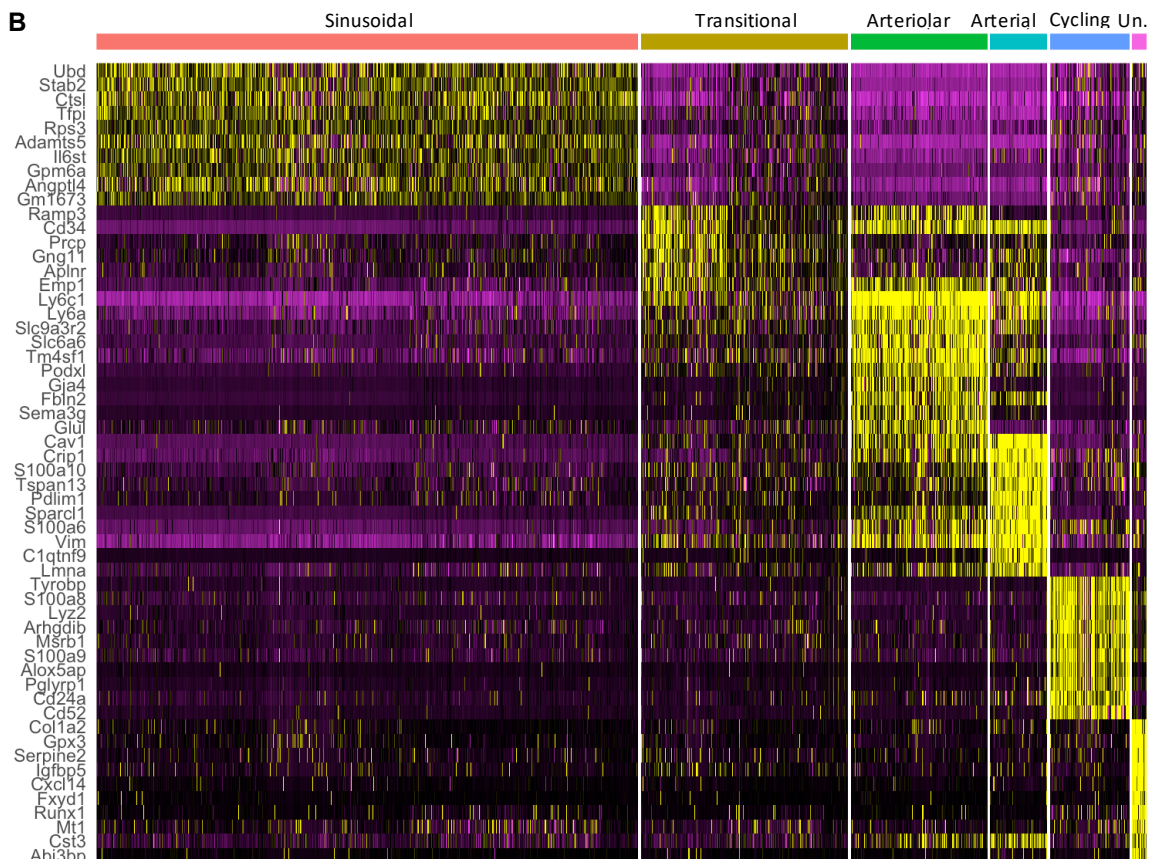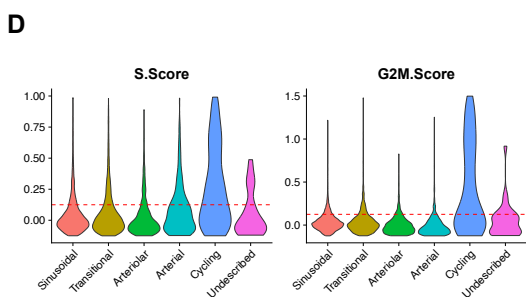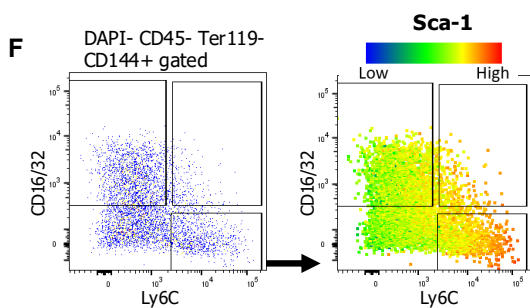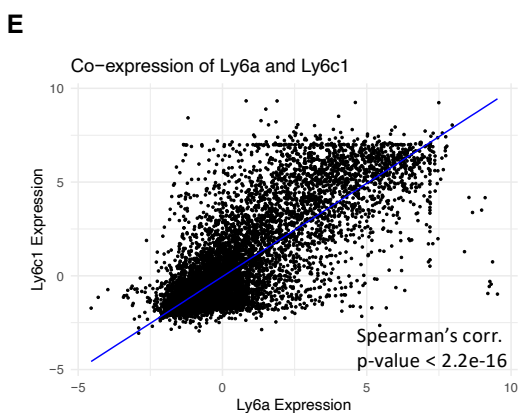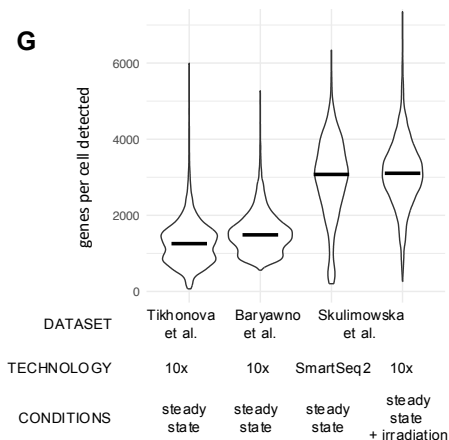

Supplementary Figure 1

**Analysis of integrated sc-RNAseq data including mouse bone marrow endothelial cells under steady-state conditions.**

**(A)** UMAP projection showing the distribution of cells derived from different datasets. **(B)** Top differentially expressed genes for each cluster, identified with ROC analysis. UN. – undescribed **(C)** Expression of Fcgr2b and Ly6c1 in all cells. **(D)** S and G2/M scores for each cluster **(E)** Correlation of Ly6c1 and Ly6a in integrated scRNA-seq datasets **(F)** Correlation of CD16/32 and Sca-1 expression in BM-ECs evaluated by flow cytometry analysis. **(G)** Number of detected genes among datasets used and generated in the study.

A

young

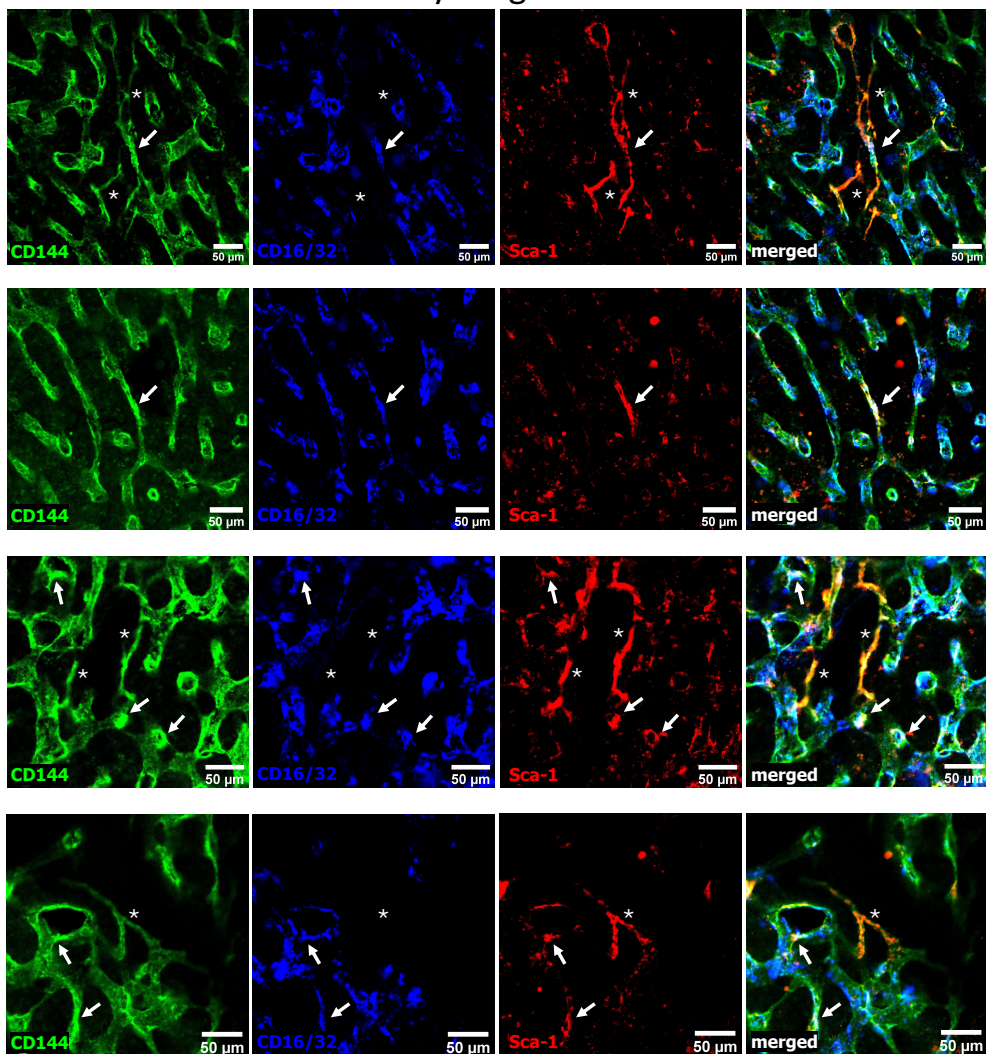

B

old

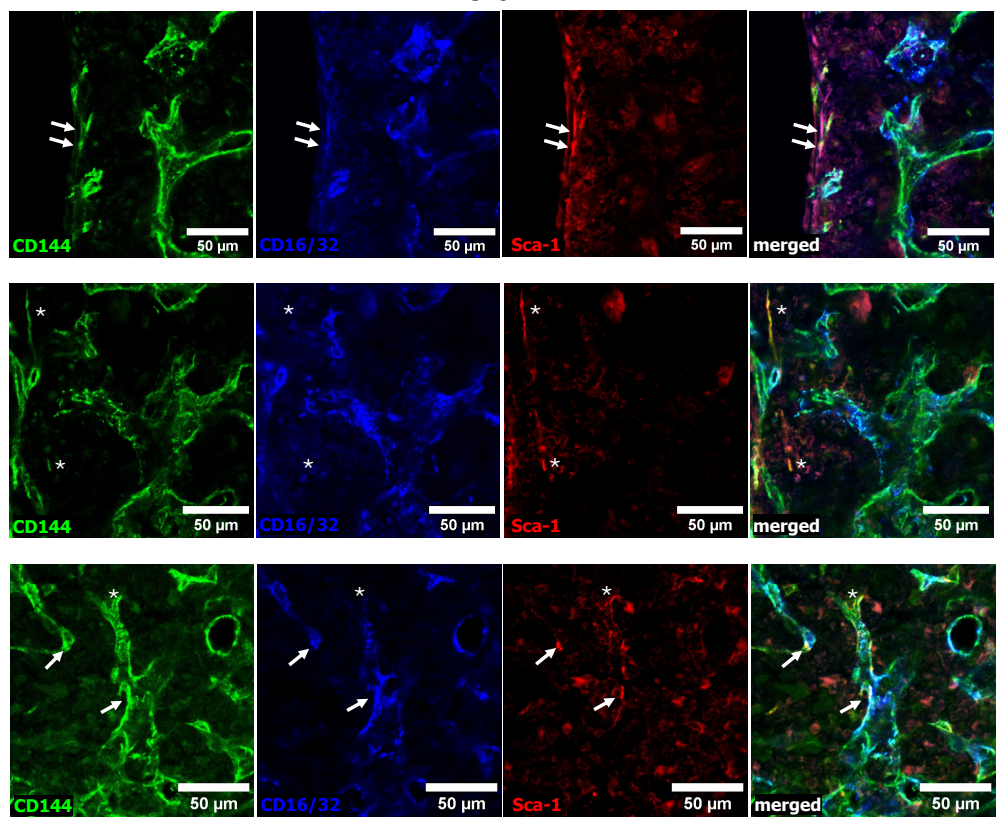



Supplementary Figure 2

**Examples of transitional Sca-1/Ly6A<sup>high</sup> CD16/32<sup>+</sup> BM-ECs detected by immunohistochemistry. (A) Young mice. (B) Old mice. The transitional BM-ECs localized between arterioles Sca-1/Ly6A<sup>high</sup> CD16/32<sup>-</sup> (\*) that along the vessel gradually change into transitional double positive Sca-1/Ly6A<sup>+</sup> CD16/32<sup>+</sup> BM-ECs (arrow), before becoming wider Sca-1/Ly6A<sup>-/low</sup> CD16/32<sup>+</sup> sinusoids.**

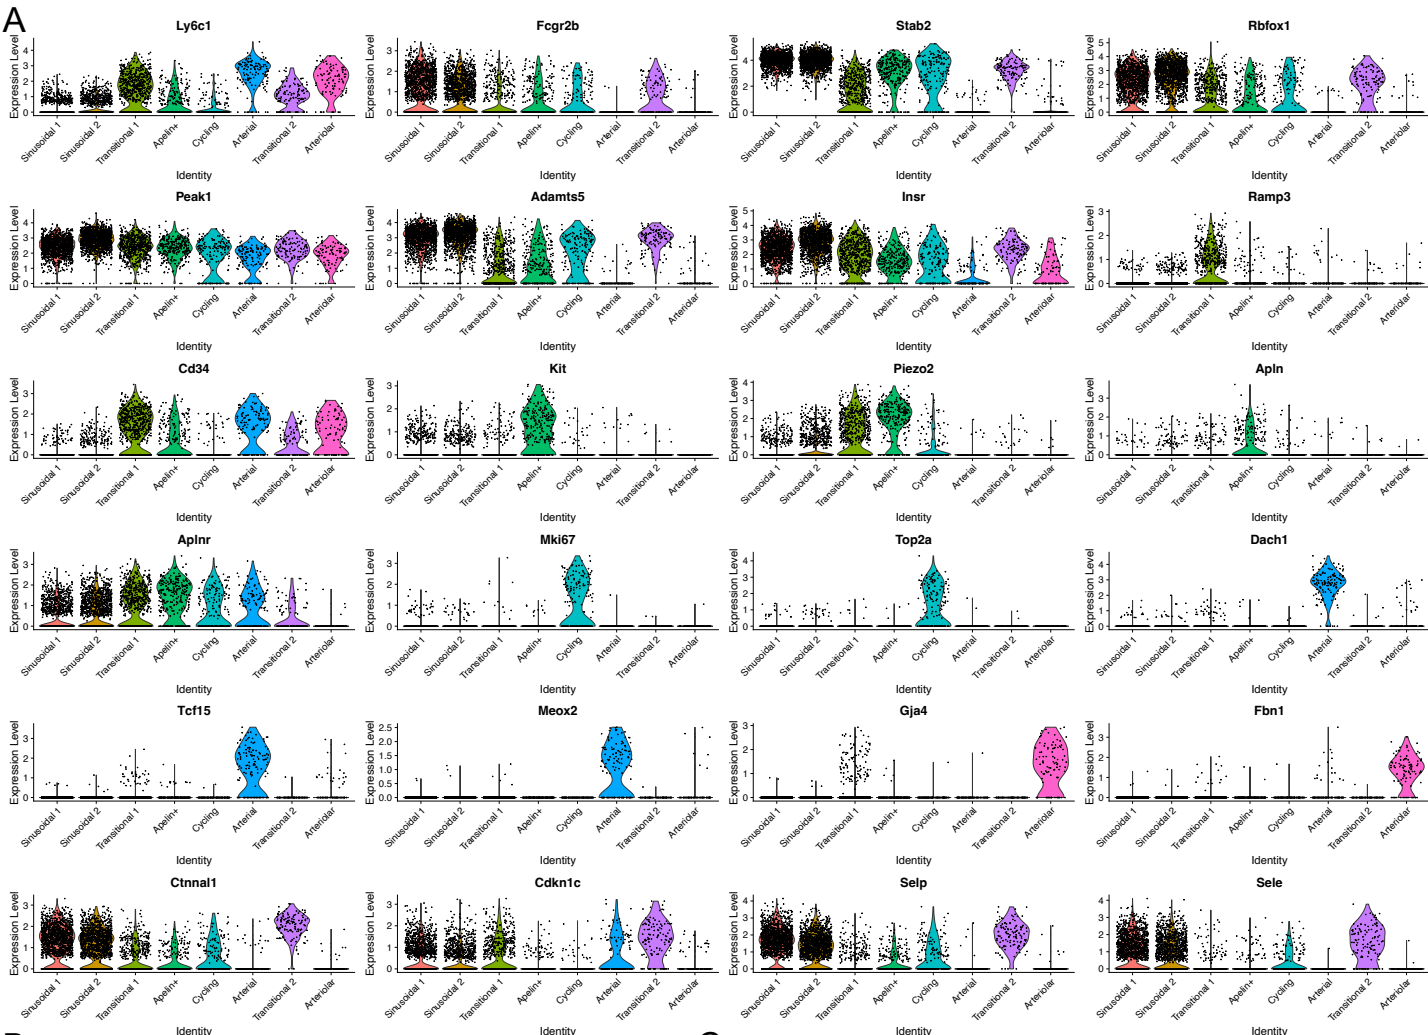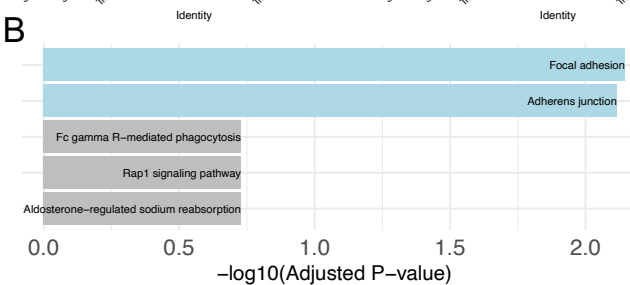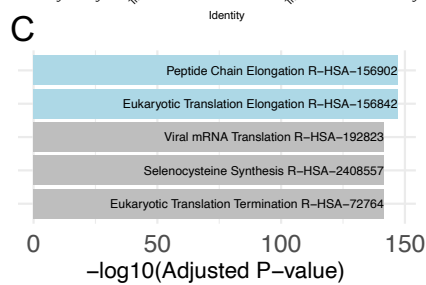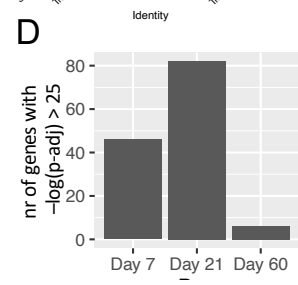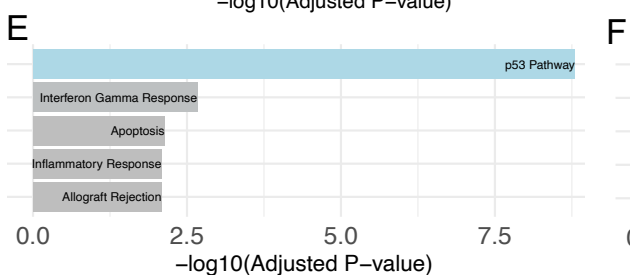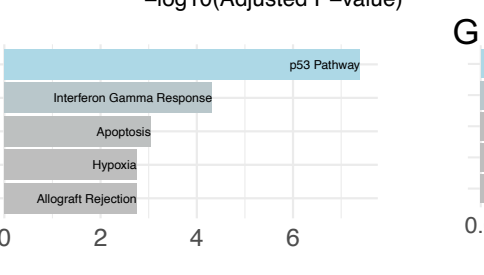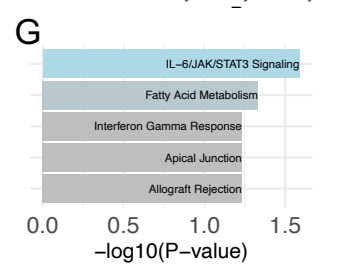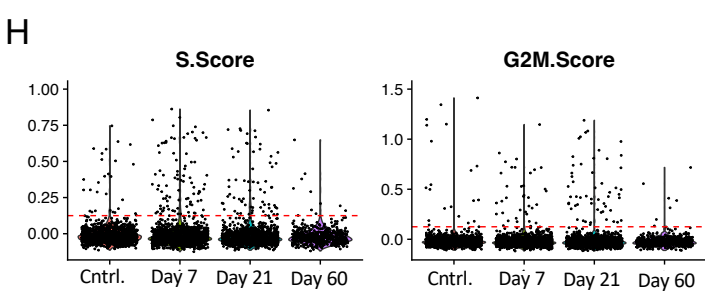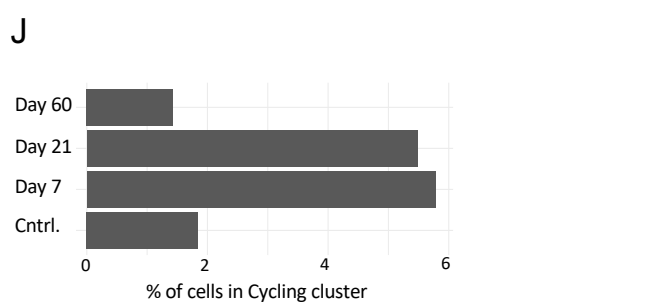

Supplementary Figure 3

**Transcriptional changes in bone marrow endothelial cells during regeneration revealed by sc-RNAseq data analysis.**

**(A)** Expression of selected cluster markers among the identified clusters **(B)** GSEA analysis on markers genes of Sinusoidal cluster using KEGG 2021database. **(C)** GSEA analysis on differentially expressed genes between Sinusoidal 2 and Sinusoidal 1 clusters using Reactome database. **(D)** Number of highly differentially expressed genes ( $-\log(p\text{-adj}) > 25$ ) in different time points post-irradiation when compared to control cells. **(E-G)** GSEA analysis on differentially expressed genes at day 7 **(E)**, day 21 **(F)**, and day 60 **(G)** post-irradiation (MSigDB). **(H)** S and G2/M scores for different experimental groups and set threshold (red dashed line) for classification as cycling cells. **(J)** Frequency of cells in the Cycling cluster in different experimental groups.

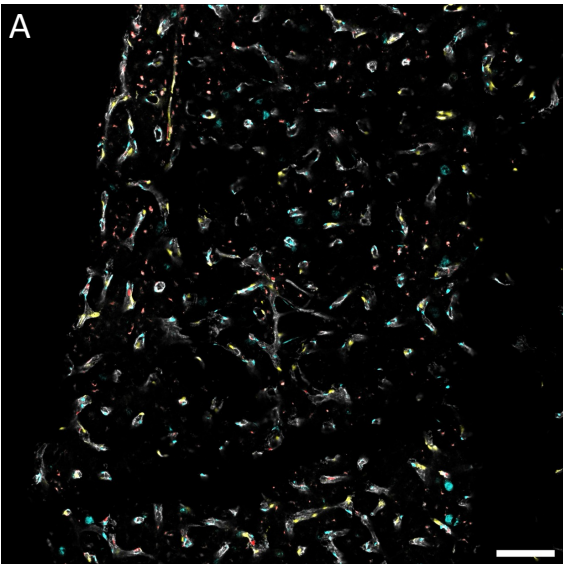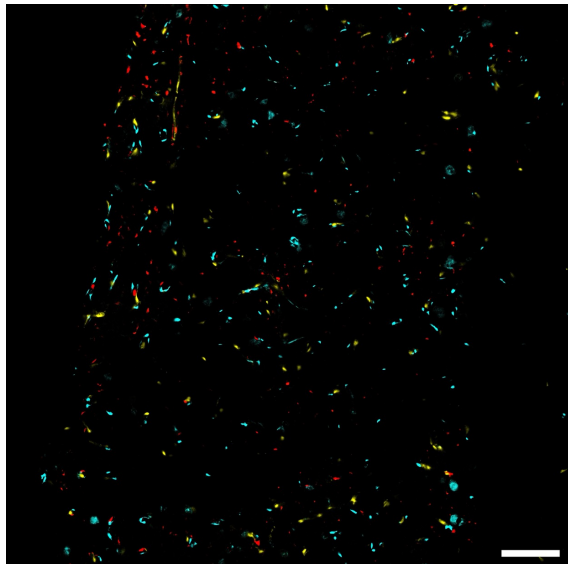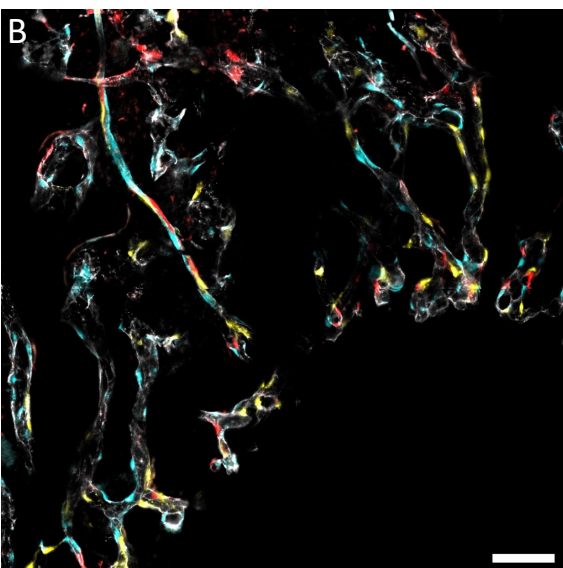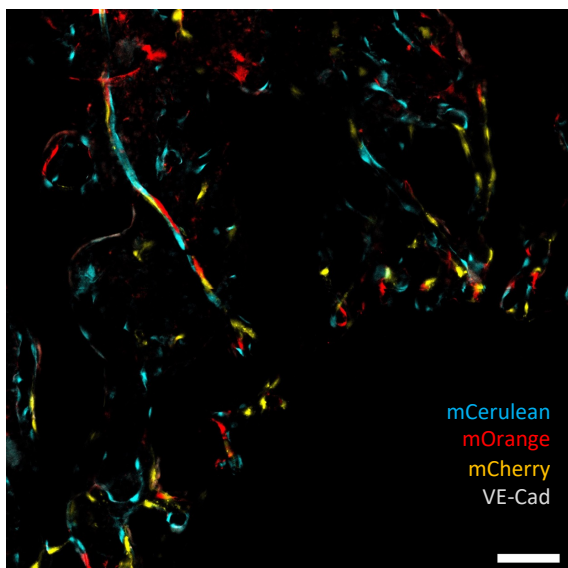

**C** irradiated day 7

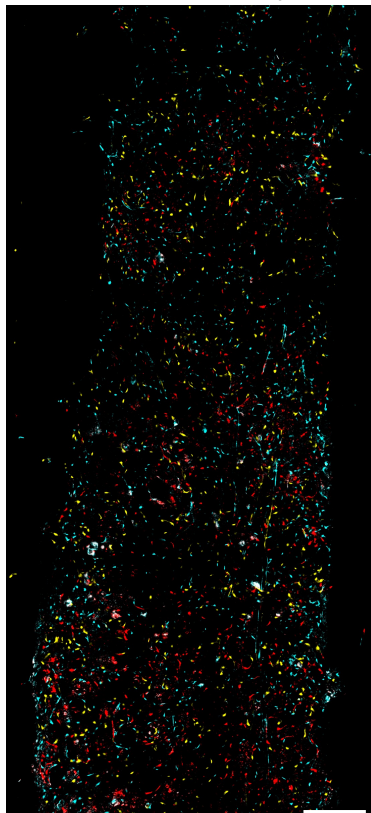

irradiated day 21

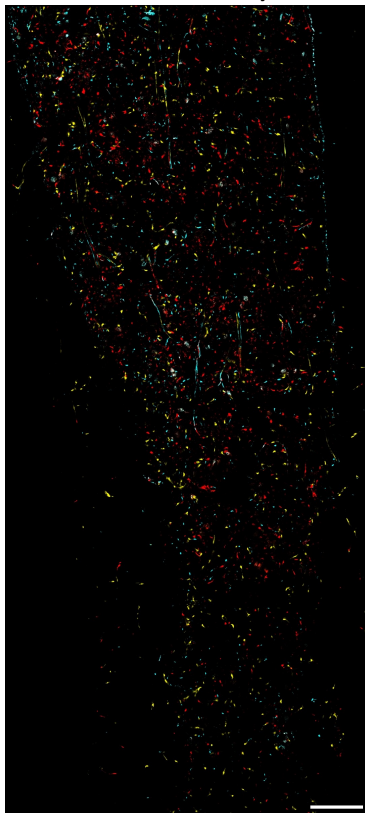

irradiated day 60

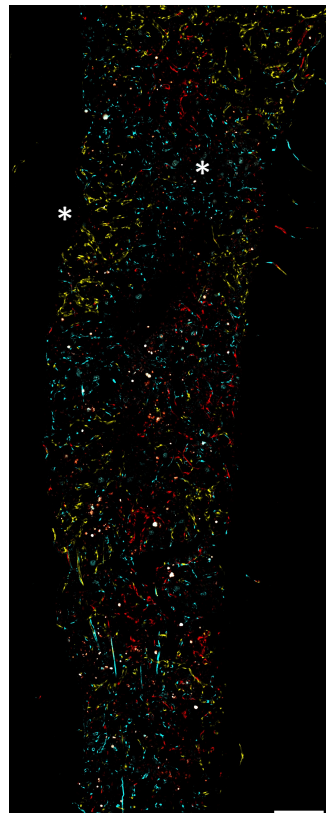

Supplementary Figure 4

**Expression pattern of fluorescent proteins in non-irradiated and irradiated BM.**

White – VE-Cadherin, blue – mCerulean, orange – mOrange, red – mCherry.

**(A,B)** The expression of random fluorescent markers upon induction was specific to ECs and labelled uniquely ECs in **(A)** diaphysis and **(B)** metaphysis region of the bone. Bars 100  $\mu\text{m}$  and 50  $\mu\text{m}$  respectively.

**(C)** We did not observe any regions with one color at 7 or 21 days after irradiation, however there were areas with single color visible 60 days post-irradiation (\*). Bars 200  $\mu\text{m}$ .



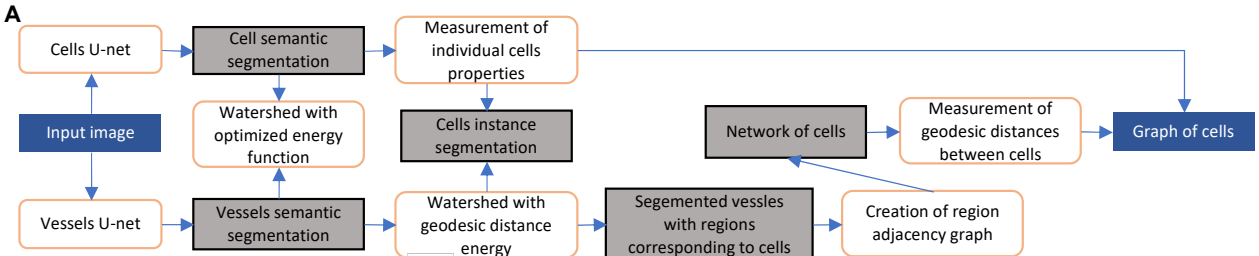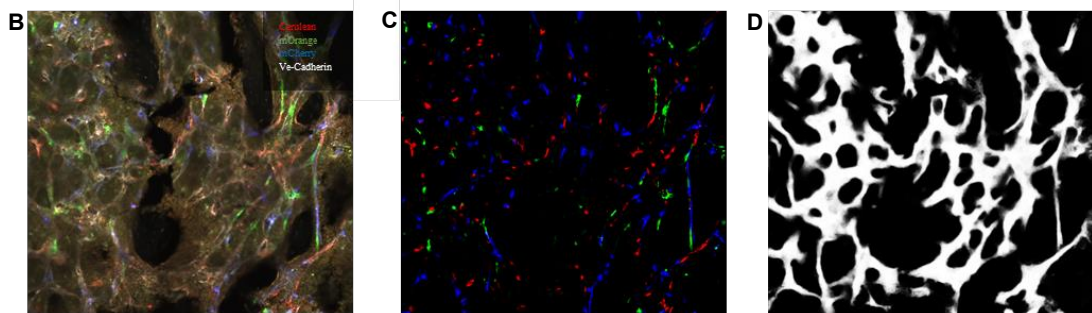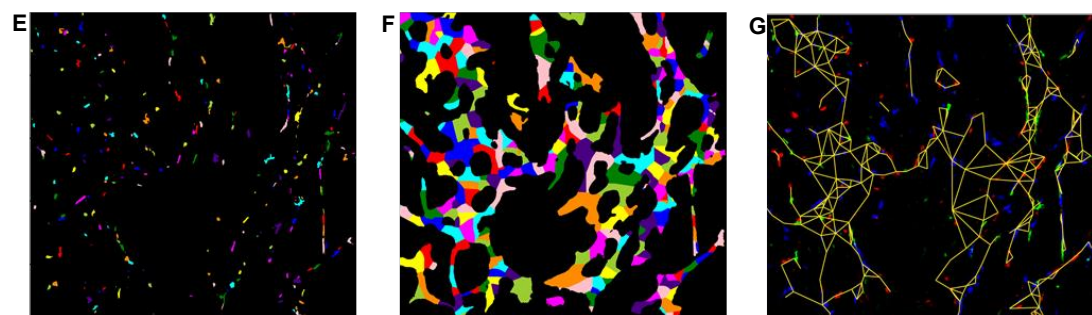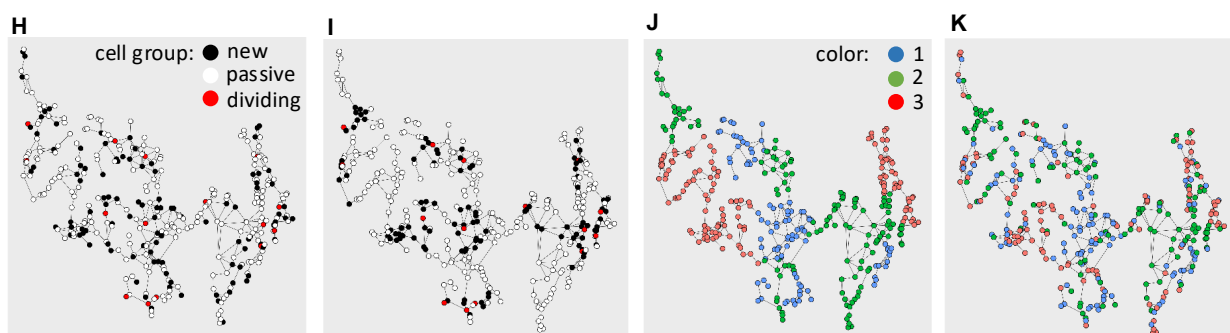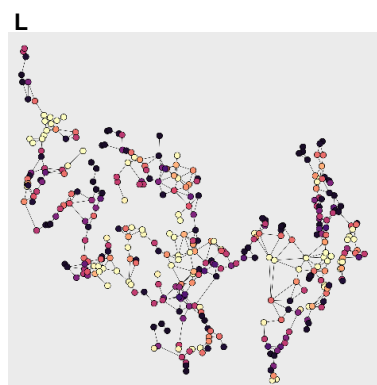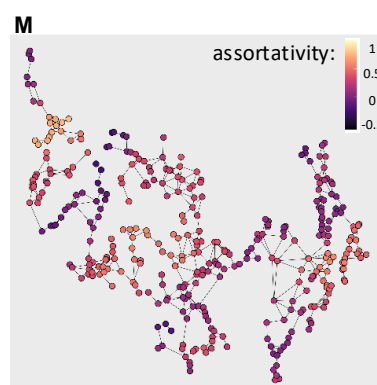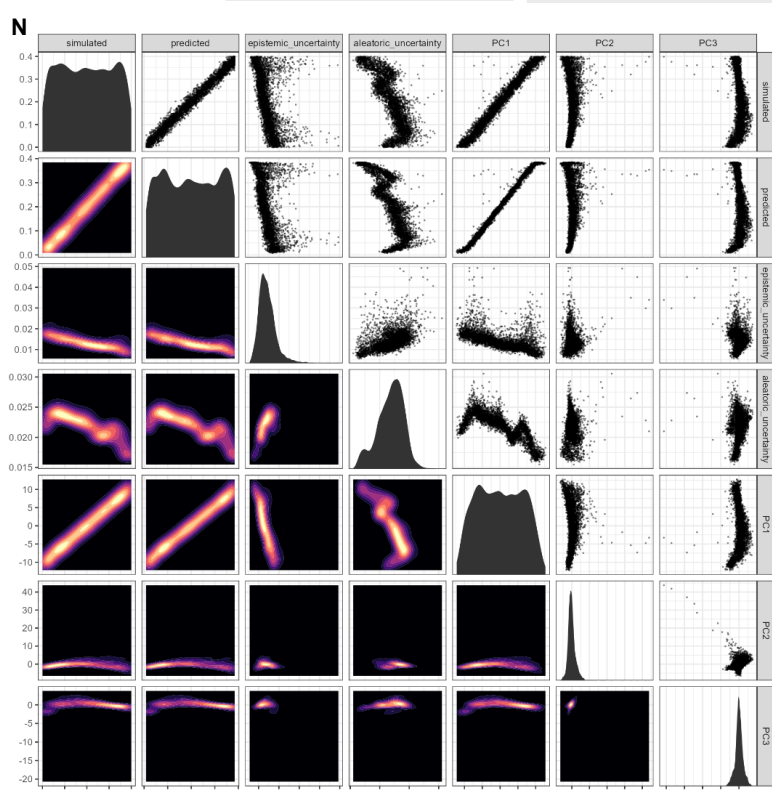

## Supplementary Figure 5

### **Strategy applied for image segmentation, graph constructions, and model training.**

**(A)** Overview of the proposed pipeline. U-Net for cells segmentation uses as an input an entire, 4 channel, image **(B)**, while U-Net for vessel segmentation uses only Ve-Cad channel. Cell semantic segmentation **(C)** and vessel segmentation **(D)** images are then used to perform instance segmentation of cells **(E)**. Cell instance segmentation and vessels segmentation are used in watershed transformation, with the watershed energy being geodesic distance from segmented cells. Through this transformation we obtain map of segmented vessels with regions corresponding to cells **(F)**, which we use to create region adjacency graph **(G)**. Region adjacency graph is then used to identify neighbours of each cell and measure distance between to them. Finally, all data about cells and the neighbourhood is pooled to create a graph.

**(H-M)** Simulation of vessel regeneration.

**(H)** The first step of the simulation randomly chooses surviving and dividing (progenitor) cells among them, here respectively 30% and 6%.

**(I)** Then the iterative “push” algorithm rearranges positions of passive cells, to create patches of new cells around progenitors, mimicking patches observed in experimental data.

**(J)** Domains with empty nodes covered by daughter cells from given proliferating cells were defined through page rank algorithm (colors for clarity).

**(K)** Random colors are then assigned to cells based on the identifier, completing the simulation.

**(L,M)** Local assortativity can be used to examine preferential contacts of cell with other cells of the same colors, indicating clonal expansion. **(L)** Low values of damping factor in the page rank algorithm (implemented in the local assortativity equation) tune the algorithm to examine if the color of a given cell is the same as the color of cells in close neighborhood, **(M)** while larger values

of the damping factor tune the algorithm to examine if the color of a given cell is the same as the color of cells within broader neighborhood area including more distant cells. Thus use of large dumping factor results in smoothing the local assortativity values over the graph.

**(N)** Predicting parameters. Data describing assortativity distribution for a given graph labelling is already well correlated with input parameters, especially for new cell fraction prediction, however model can still improve the prediction, especially for the outliers. Majority of the prediction uncertainty is aleatoric stemming from randomness in color selection, and increases with survival rate.
